# Supplementary material for: The Multisource Vegetation Inventory (MVI): A Satellite-Based Forest Inventory for the Northwest Territories Taiga Plains
Source: MDPI journal article supplement (doi:10.3390/rs14051108), 2022-02-24
Supplement: s1 [file s1]

Archive with 1 entries (1 files):
- remotesensing-1449131-supplementary.pdf
